# Supplementary material for: Mutations Q93H and E97K in TPM2 Disrupt Ca-Dependent Regulation of Actin Filaments
Source: MDPI journal article supplement (doi:10.3390/ijms22084036), 2021-04-14
Supplement: s1 [file s1]

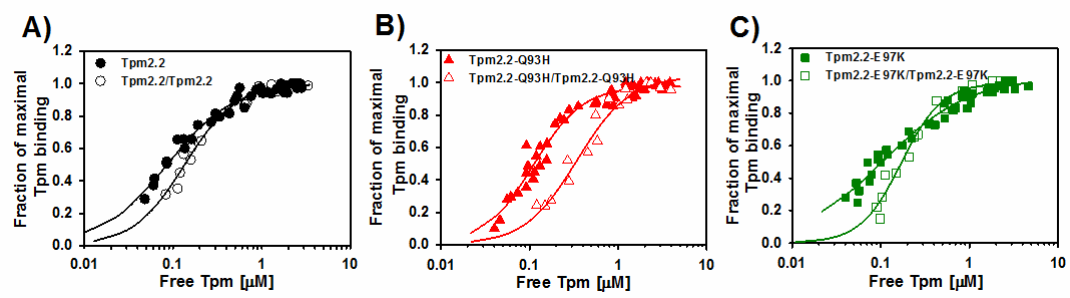

Figure S1. Effects of crosslinking on binding of Tpm2.2 to F-actin.
